# Supplementary material for: Flotillins promote T cell receptor sorting through a fast Rab5–Rab11 endocytic recycling axis
Source: PubMed Central journal article supplement (PMC6763463; doi:10.1038/s41467-019-12352-w), 2019-09-26
Supplement: 41467_2019_12352_MOESM1_ESM.pdf [file 41467_2019_12352_MOESM1_ESM.pdf]

# Flotillins promote T cell receptor sorting through a fast Rab5-Rab11 endocytic recycling axis

G.M.I. Redpath et al.

## SUPPLEMENTARY INFORMATION

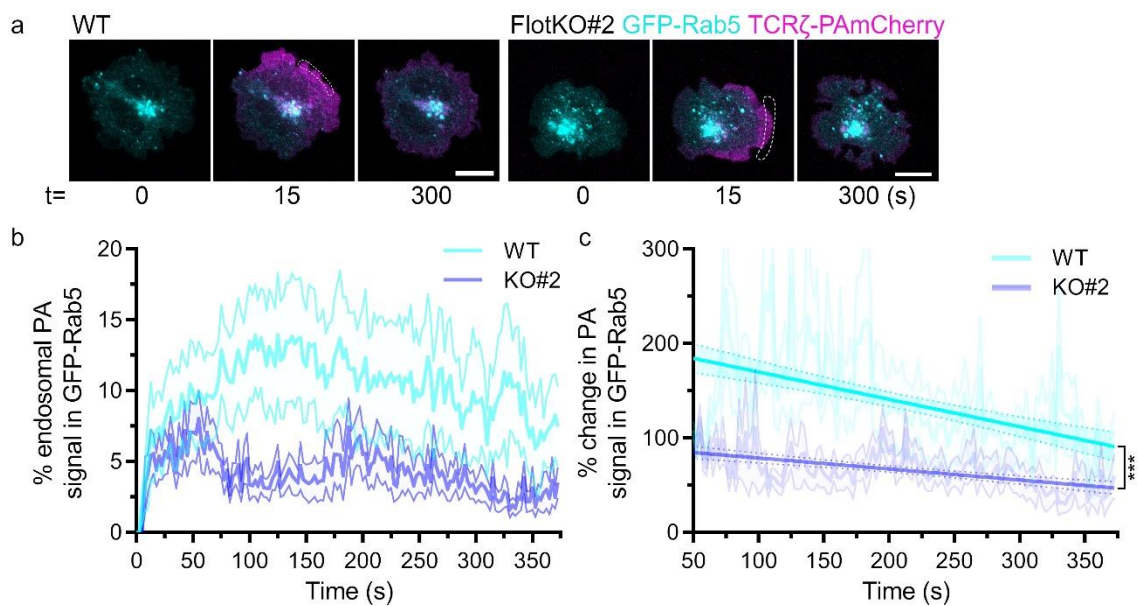

**Figure S1: Flotillins mediate sorting of internalised TCR $\zeta$  into Rab5 in a second flotillin knockout cell line. (a)** Representative images of TCR $\zeta$ -PAmCherry photoactivated at the dashed regions sorting into EGFP-Rab5 endosomes in WT (left panel) and FlotKO (right panel) Jurkat T cells. Cells were photoactivated for 5 frames with 2.5 second intervals, then imaged every 2.5 seconds for 150 frames. **(b)** % endosomal TCR $\zeta$ -PAmCherry intensity present in Rab4 endosomes in WT or FlotKO Jurkat T cells over time. Dashed line represents the timepoint from which the TCR $\zeta$ -PAmCherry intensity significantly diverges in Rab4 endosomes between WT and FlotKO. **(c)** Percentage reduction in endosomal TCR $\zeta$ -PAmCherry intensity in Rab5 endosomes from the 50-55 second timepoint. Fitted linear regression line is in bold. n.s. indicates differences between slopes are not significantly different. \*\*\* indicates slopes are highly significantly different. Data points= means of 3 independent experiments (WT: 3; 5; 5 cells, KO#2: 3; 5; 4 cells per experiment), error bars= mean $\pm$  SEM. All images acquired on a Zeiss 880 confocal microscope. Scale bar = 5 $\mu$ m.

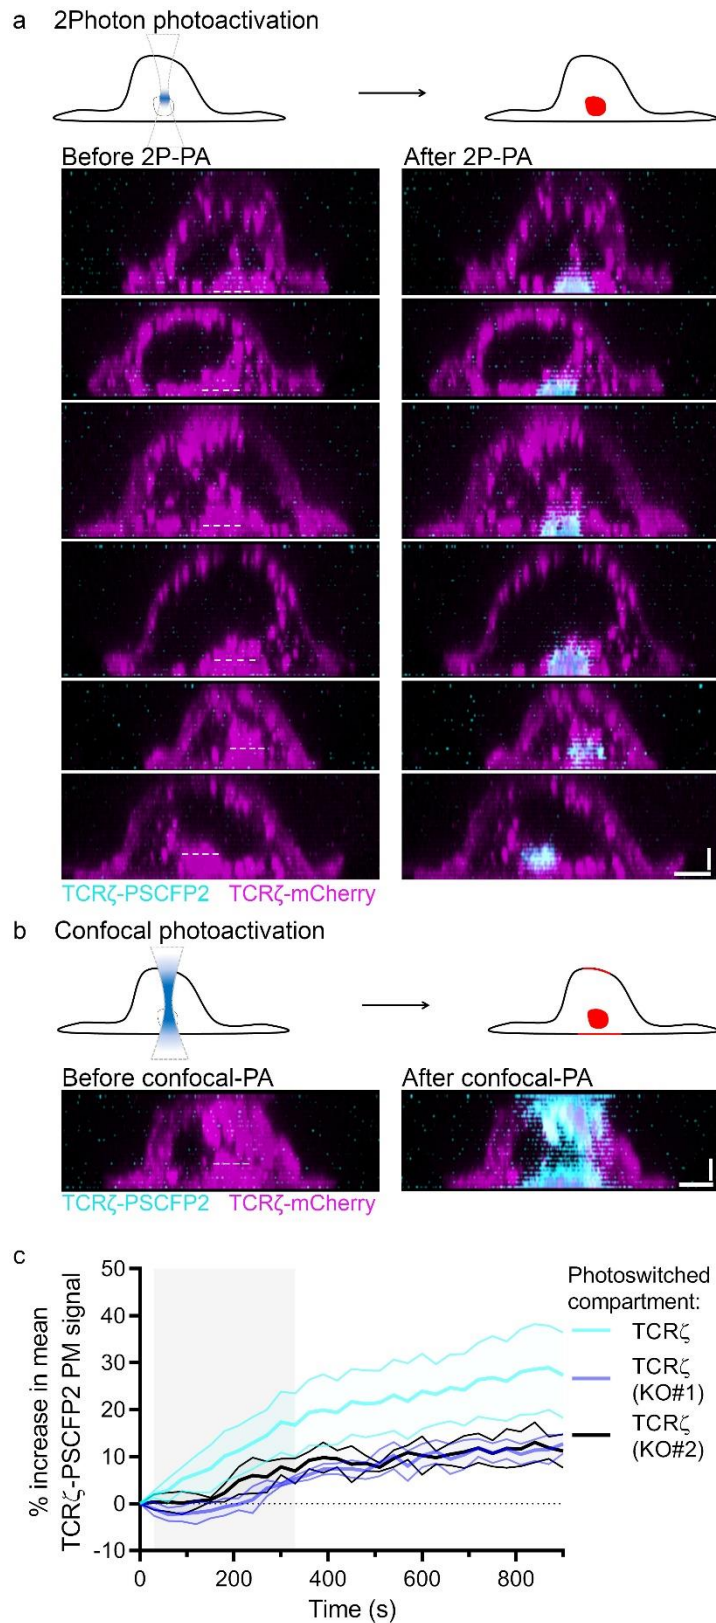

**Figure S2: Two-photon photoactivation in fixed cells.** (a) Jurkat T cells transfected with TCR $\zeta$ -mCherry (magenta) and TCR $\zeta$ -PSCFP2 (cyan) were activated on glass coverslips and fixed 20 minutes post activation. Z-stacks of cells were imaged before (left) and after (right) photoactivation with 800 nm light from a two-photon laser at the indicated z-depth. Dashed white line indicates photoactivated region. (b) Confocal photoactivation at 2.5  $\mu$ m z-depth of cells prepared as in (a). (c) % increase in photoactivated TCR $\zeta$ -PSCFP2 signal over time at the plasma membrane when activated from cell centre compartments labelled by TCR $\zeta$ -mCherry in WT or two FlotKO Jurkat T cells lines. Greyed region= time of photoactivation. Horizontal scale bars = 5  $\mu$ m, vertical = 2  $\mu$ m. Error bars= mean $\pm$  SEM from 1 experiment of 3 (WT); 2 (FlotKO#2) and 2 (FlotKO#1) cells.

a WT Jurkat T cells, TCR $\zeta$ -GFP + APEX2-GBP

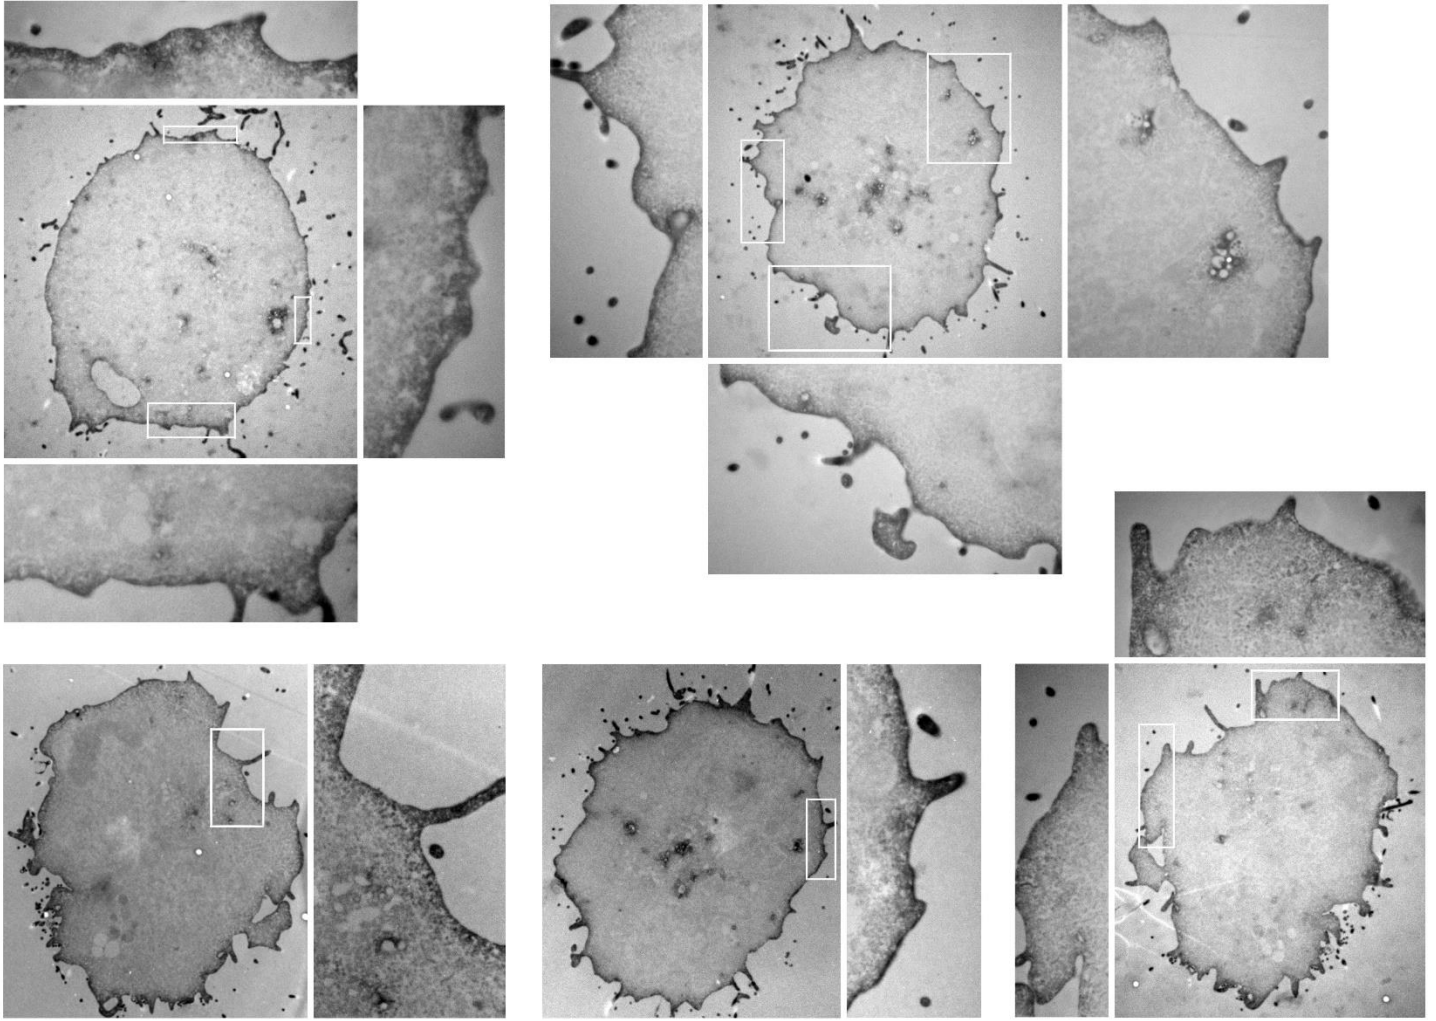

b Flotillin1/2 KO Jurkat T cells, TCR $\zeta$ -GFP + APEX2-GBP

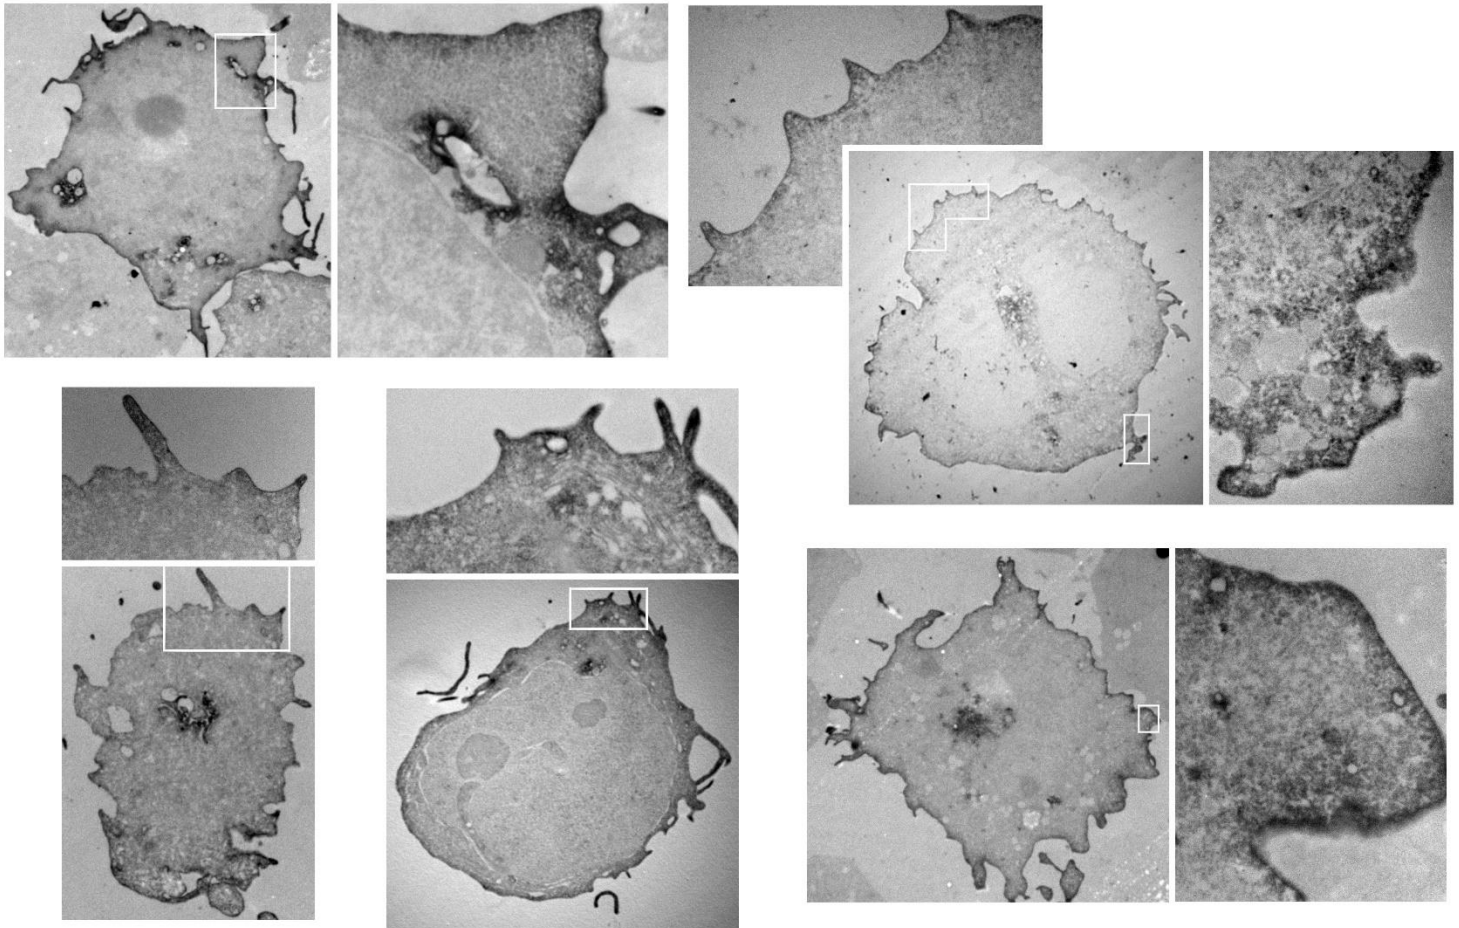

**Figure S3: Flotillins do not regulate plasma membrane morphology of Jurkat T cells.** (a) Transmission electron microscopy images of WT Jurkat T cells with DAB-reacted APEX2-GBP co-expressed with TCR $\zeta$ -GFP. Images are obtained from 3 (WT) or 4 (FlotKO#1) biologically independent experiments (WT: 4; 3; 1 cells per experiment) and 4 (FlotKO#1: 7; 1; 2; 2 cells per experiment) (b) Transmission electron microscopy images of flotillin 1 and 2 knockout Jurkat T cells with DAB-reacted APEX2-GBP co-expressed with TCR $\zeta$ -GFP. White boxes denote insets.

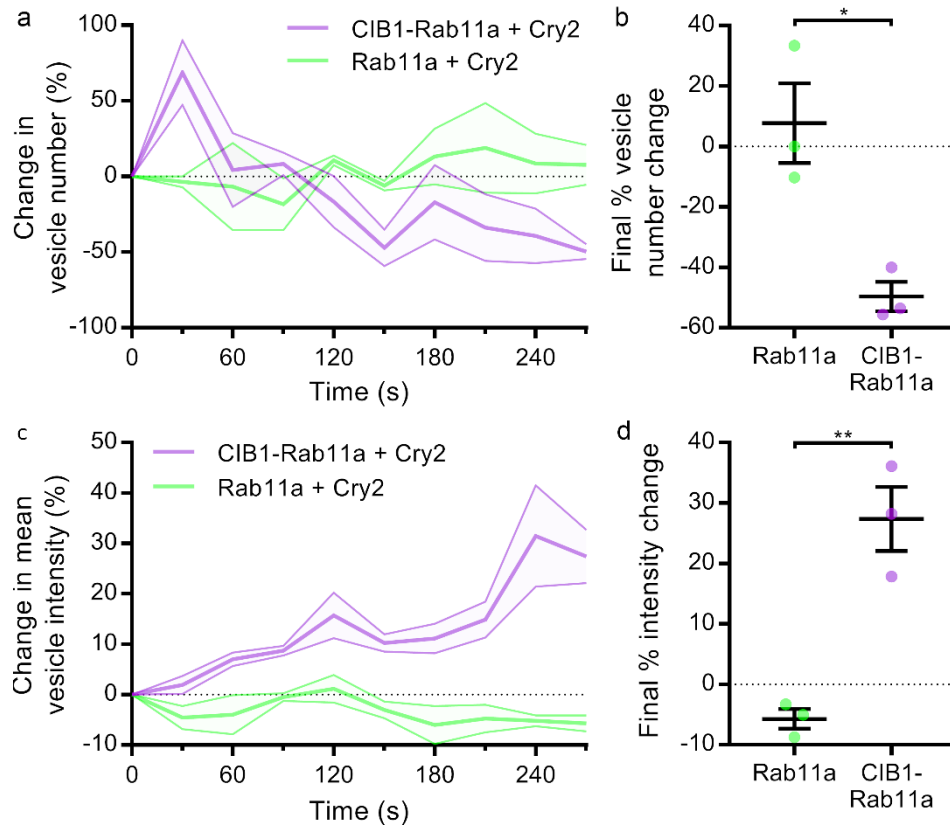

**Figure S4: Acute exposure to blue light induces Cry2clust-mediated CIB1-Rab11 clustering.** Jurkat T cells transfected with mCerulean-Cry2clust, TCR $\zeta$ -PSCFP2 and either mCherry-Rab11a or CIB1-FugeneRed-Rab11a were exposed to 488 nm light by confocal imaging for three frames through the z plane every 30 seconds for 10 iterations. **(a)** Quantification of the percentage change in CIB1-Rab11a and Rab11a vesicle number over time with 488 nm light exposure. **(b)** Percentage change in CIB1-Rab11a and Rab11a vesicle number at the final timepoint of 488 nm light exposure. **(c)** Quantification of the percentage change in CIB1-Rab11a and Rab11a vesicle mean intensity over time with 488 nm light exposure. **(d)** Percentage change in CIB1-Rab11a and Rab11a vesicle mean intensity at the final timepoint of 488 nm light exposure. Data points indicate means of independent experiments, error bars indicate mean  $\pm$  SEM. \* =  $p < 0.05$ , \*\* =  $p < 0.01$  from Student's T-test of 3 independent experiments of 2; 1; 1 (mCherry-Rab11a) and 2; 1; 2 (CIB1-FugeneRed-Rab11a) cells.
